# Supplementary material
Source: HighWire-hosted journal article supplement (https://cmaj.ca/highwire/filestream/77808/field_highwire_adjunct_files/0/200840-res-1-at.pdf)
Supplement: 200840-res-1-at.pdf [file 200840-res-1-at.pdf]

**Appendix 1 (as submitted by the authors):** Visualization of information provided by NT-proBNP measurement assessed by analyzing pre- and post-test probabilities.

**A) Measures of added predictive value (fraction of new information from NT-proBNP)**

```
pre <- predict(baseline_model, type='fitted') #pre-test prob
post <- predict(marker_model, type='fitted') #post-test prob

a <- baseline_model$stats['Model L.R.']
b <- marker_model$stats['Model L.R.']
c <- a/b
d <- 1-c
e <- baseline_model$stats['R2']
f <- marker_model$stats['R2']
g <- var(pre)
h <- var(post)
i <- g/h
j <- 1-i
br2 <- function(p) var(p) / (var(p) + sum(p * (1 - p)) / length(p))
k <- br2(pre)
l <- br2(post)
m <- k/l
n <- 1-m
```

```
Pre_test_LR_chi2 <- round(a, 2) #105.4
Post_test_LR_chi2 <- round(b, 2) #125.0
Adequacy_of_base_model <- round(c, 2) #0.84
```

Fraction of new information from BNP <- round(d, 2) #0.16

```
Pre_test_R2 <- round(e, 3) #0.093
Post_test_R2 <- round(f, 3) #0.11
Variance_of_pre_test_risk <- round(g, 6) # 0.000166
Variance_of_post_test_risk <- round(h, 6) # 0.000195
Relative_explained_variation_1 <- round(i, 2) #0.85
```

Fraction of new information discrimination <- round(j, 2) #0.15

```
Pre_test_fraction_explained_risk <- round(k, 4) #0.015
Post_test_fraction_explained_risk <- round(l, 4) #0.0177
Relative_explained_variation_2 <- round(m, 2) #0.85
```

Fraction of new information <- round(n, 2) #0.15

**B) Histograms of predicted probabilities before (pre-test) and after (post-test) adding NT-proBNP to the baseline logistic regression model for POAF**

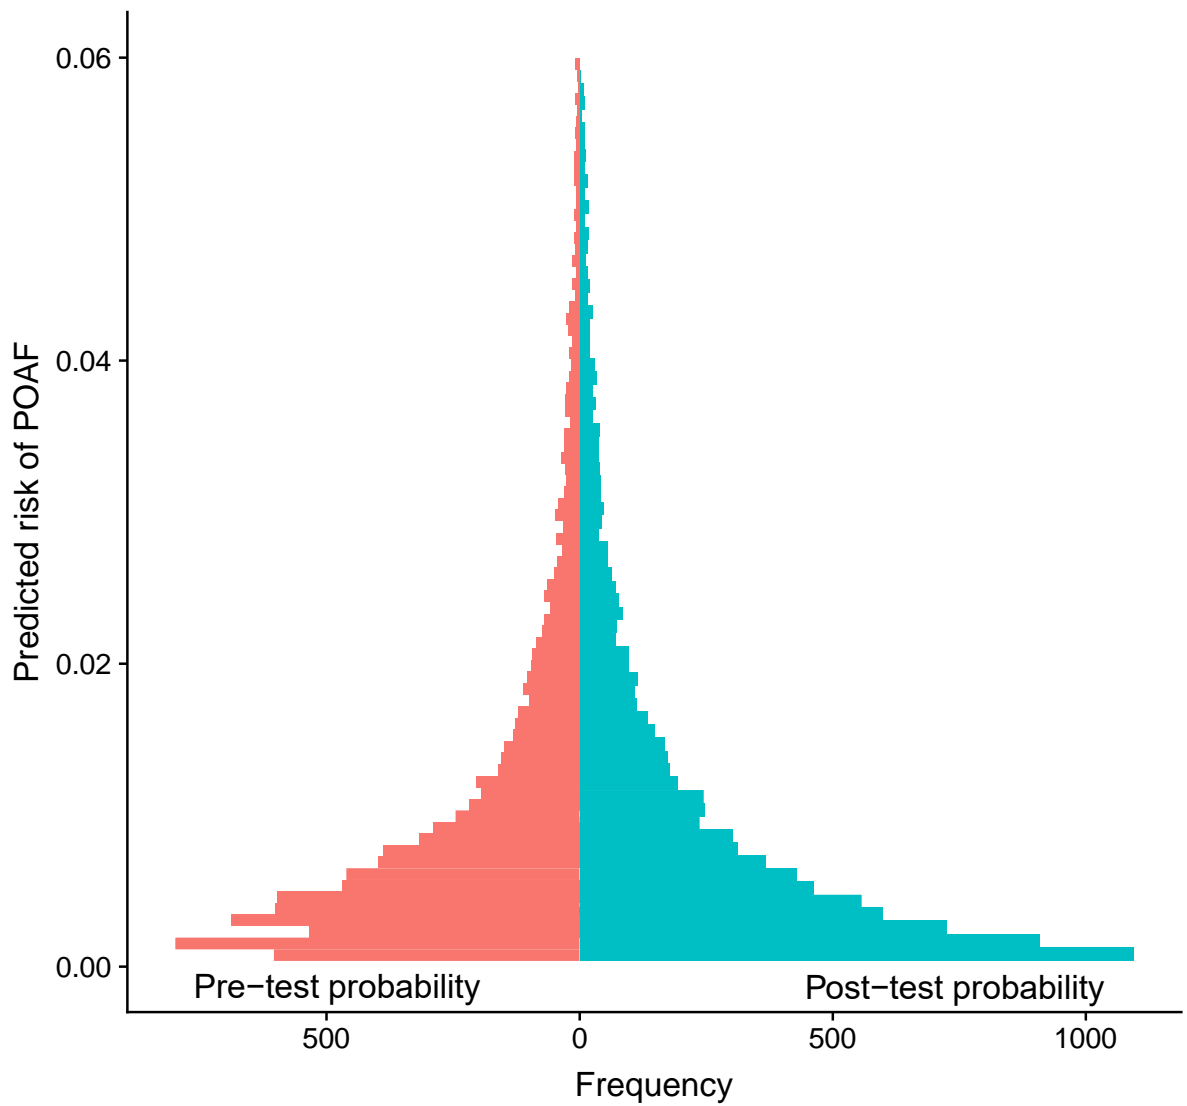

**C) Biomarker model internal validation (bootstrap, n=500)**

| Index      | Original Sample | Training Sample | Test Sample | Optimism | Corrected Index | <i>n</i> |
|------------|-----------------|-----------------|-------------|----------|-----------------|----------|
| $D_{xy}$   | 0.5872          | 0.6080          | 0.5663      | 0.0417   | 0.5455          | 500      |
| $R^2$      | 0.1102          | 0.1210          | 0.1000      | 0.0210   | 0.0892          | 500      |
| Intercept  | 0.0000          | 0.0000          | -0.4235     | 0.4235   | -0.4235         | 500      |
| Slope      | 1.0000          | 1.0000          | 0.8908      | 0.1092   | 0.8908          | 500      |
| $E_{\max}$ | 0.0000          | 0.0000          | 0.1184      | 0.1184   | 0.1184          | 500      |
| $D$        | 0.0127          | 0.0139          | 0.0115      | 0.0024   | 0.0102          | 500      |
| $U$        | -0.0002         | -0.0002         | 0.0002      | -0.0004  | 0.0002          | 500      |
| $Q$        | 0.0129          | 0.0141          | 0.0113      | 0.0028   | 0.0101          | 500      |
| $B$        | 0.0109          | 0.0108          | 0.0109      | -0.0001  | 0.0109          | 500      |
| $g$        | 1.4576          | 1.5704          | 1.3833      | 0.1871   | 1.2705          | 500      |
| $g_p$      | 0.0126          | 0.0130          | 0.0121      | 0.0010   | 0.0117          | 500      |

**D) Relative importance of predictors in the biomarker model**

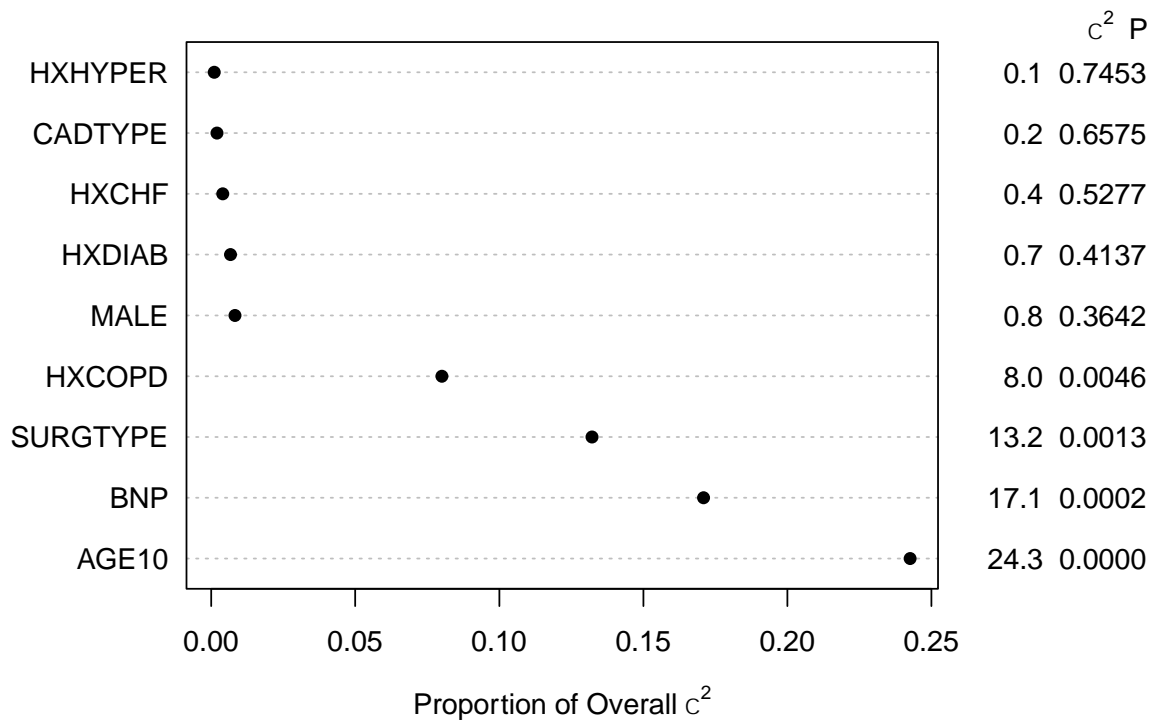

**E) Calibration belt of the baseline model  
(without NT-proBNP)**

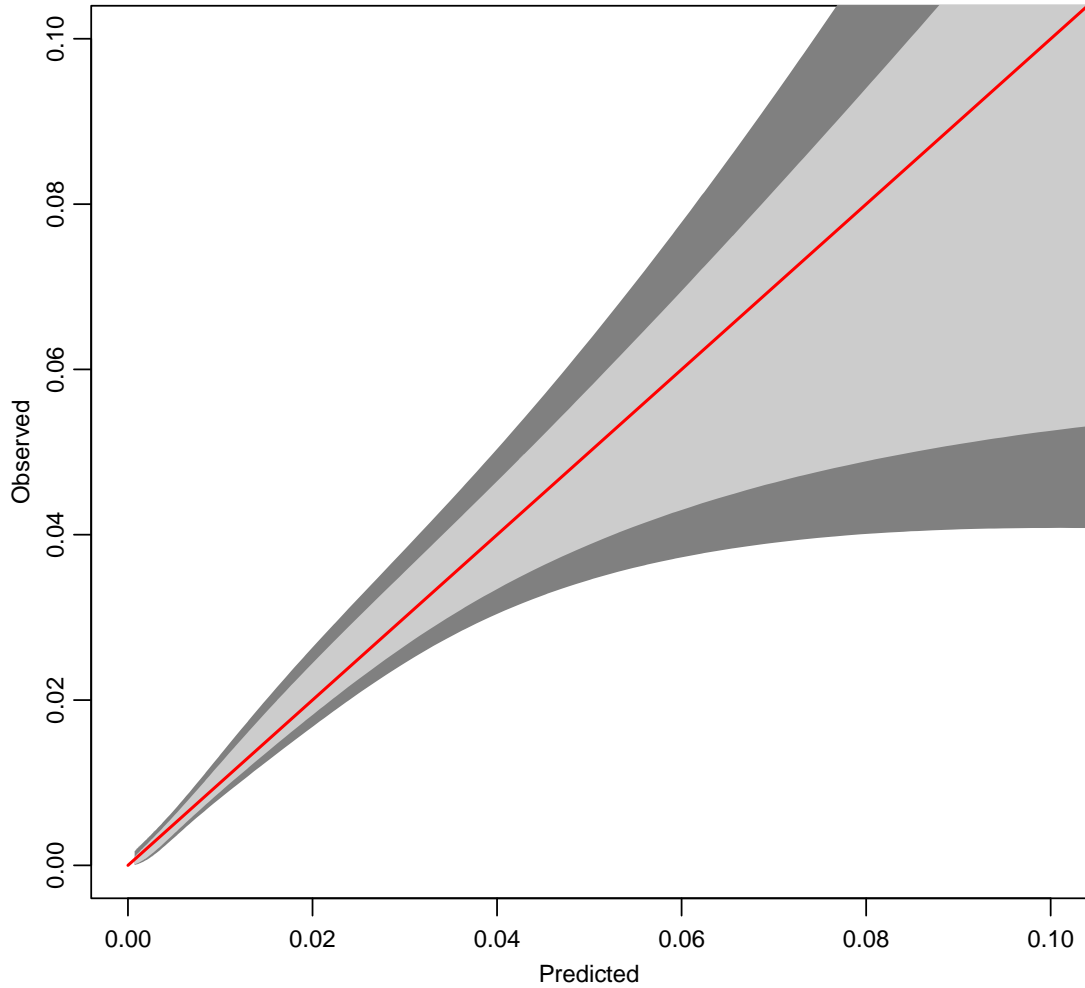

**Footnote:** The bisector (red line) represents perfect calibration; light grey area represents 80% confidence intervals; dark grey area represents 95% confidence intervals.

**F) Calibration belt of the biomarker model  
(after adding NT-proBNP to the baseline model)**

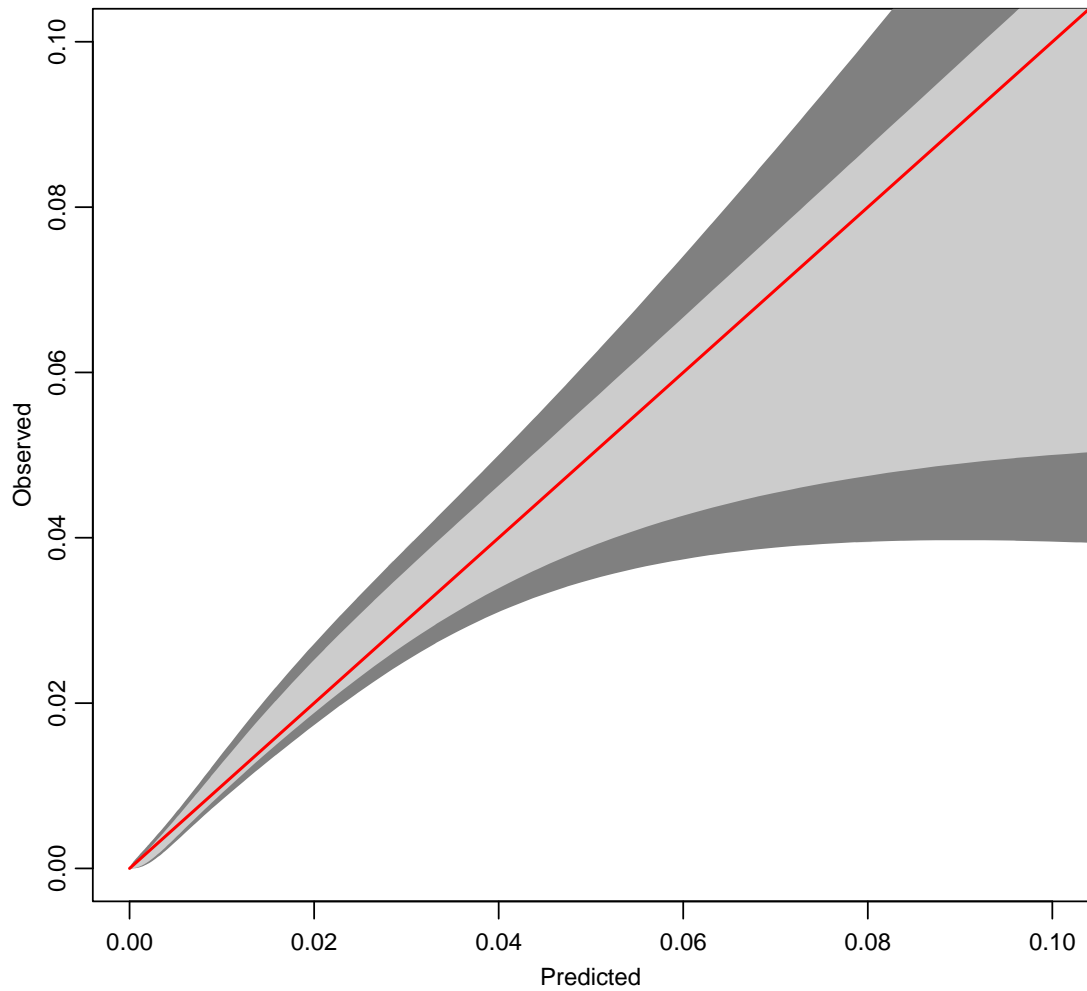

**Footnote:** The bisector (red line) represents perfect calibration; light grey area represents 80% confidence intervals; dark grey area represents 95% confidence intervals.

**G) Adjusted ORs for different values of age**

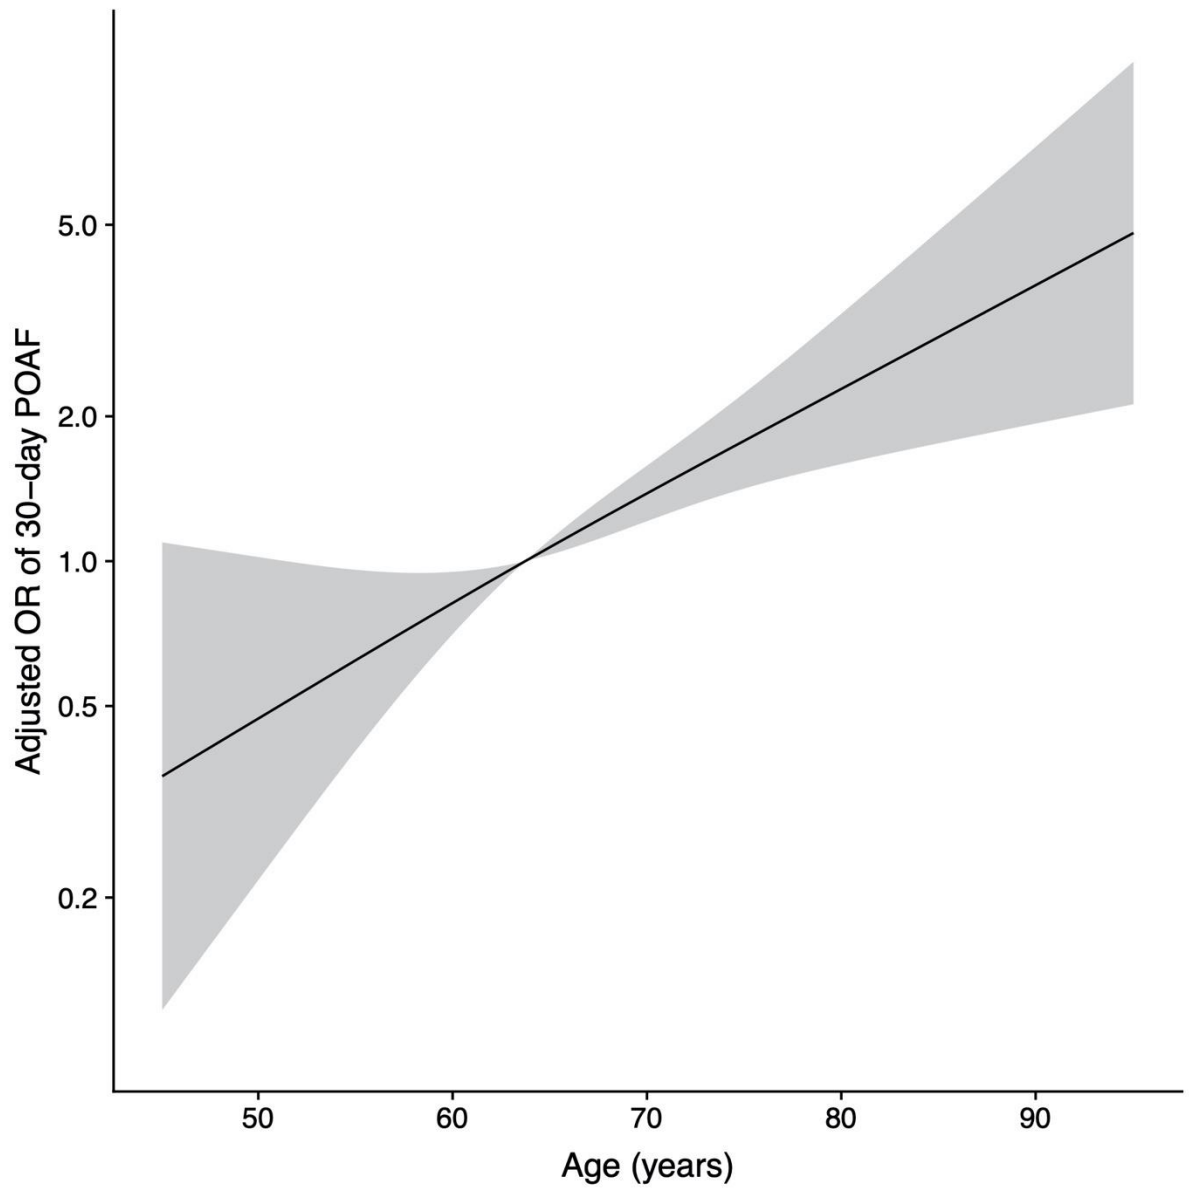

**ONLINE TABLES**

**Supplementary Table 1.** Literature review of studies describing incidence of POAF in patients undergoing non-cardiac surgeries

| <b>Study</b>                           | <b>Design</b>               | <b>Population</b> | <b>Inclusion of urgent/emergent procedures</b> | <b>Exclusion of patients with previous history of AF</b> | <b>Number of events</b> | <b>Incidence</b> |
|----------------------------------------|-----------------------------|-------------------|------------------------------------------------|----------------------------------------------------------|-------------------------|------------------|
| <b>Non-cardiac, thoracic</b>           |                             |                   |                                                |                                                          |                         |                  |
| <b>Amar, 2000(1)</b>                   | Prospective, interventional | 163               | Not specified                                  | Yes                                                      | 40                      | <b>24.5%*</b>    |
| <b>Passman, 2005(2)</b>                | Retrospective               | 856               | No                                             | Yes                                                      | 147                     | <b>17.2%</b>     |
| <b>Roselli, 2005(3)</b>                | Retrospective               | 604               | Not specified                                  | No                                                       | 113                     | <b>18.7%</b>     |
| <b>Cardinale, 2007(4)</b>              | Prospective                 | 400               | No                                             | Yes                                                      | 72                      | <b>18.0%</b>     |
| <b>Riber, 2012(5)</b>                  | Prospective, interventional | 120               | No                                             | Yes                                                      | 38                      | <b>31.7%</b>     |
| <b>Rao, 2012(6)</b>                    | Retrospective               | 997               | Not specified                                  | Yes                                                      | 209                     | <b>21.0%</b>     |
| <b>Ciszewski, 2013</b>                 | Prospective                 | 117               | Not specified                                  | Yes                                                      | 19                      | <b>16.2%</b>     |
| <b>Berry, 2014(7)</b>                  | Retrospective               | 1 412             | Not specified                                  | Yes                                                      | 232                     | <b>16.4%</b>     |
| <b>Gialdini, 2014(8)</b>               | Registry                    | 35 992            | Not specified                                  | Yes                                                      | 1337                    | <b>3.7%</b>      |
| <b>Cardinale, 2016<sup>‡</sup> (9)</b> | Prospective, interventional | 911               | Not specified                                  | Yes                                                      | 75                      | <b>8.2%</b>      |
| <b>Lee, 2016(10)</b>                   | Retrospective               | 4 662             | No                                             | Yes                                                      | 555                     | <b>11.9%</b>     |
| <b>Chin, 2016(11)</b>                  | Retrospective               | 583               | No                                             | Yes                                                      | 63                      | <b>10.8%</b>     |
| <b>Butt, 2018 (12)**</b>               | Registry                    | 1 520 109         | Not specified                                  | Yes                                                      | 6048                    | <b>0.4%</b>      |
| <b>Nielsen, 2004(13)</b>               | Retrospective               | 200               | No                                             | No                                                       | 78                      | <b>39.0%</b>     |
| <b>Imperatori, 2012(14)</b>            | Prospective                 | 454               | No                                             | Yes                                                      | 45                      | <b>9.9%</b>      |
| <b>Non-cardiac, nonthoracic</b>        |                             |                   |                                                |                                                          |                         |                  |
| <b>Brathwaite, 1998(15)</b>            | Prospective                 | 404               | Not specified                                  | Yes                                                      | 31                      | <b>7.7%</b>      |
| <b>Polanczyk, 1998(16)</b>             | Prospective                 | 4 181             | No                                             | No                                                       | 256                     | <b>4.1%</b>      |
| <b>Sohn, 2009(17)</b>                  | Retrospective               | 7 756             | Yes                                            | Yes                                                      | 30                      | <b>0.4%</b>      |
| <b>Gialdini,</b>                       | Registry                    | 1 606 951         | Not specified                                  | Yes                                                      | 11537                   | <b>0.7%</b>      |

| <b>2014(8)</b>                                       |                             |         |               |     |      |             |
|------------------------------------------------------|-----------------------------|---------|---------------|-----|------|-------------|
| <b>Blackwell, 2015(18)</b>                           | Registry                    | 4 345   | No            | Yes | 210  | <b>4.8%</b> |
| <b>Kothari, 2016(19)</b>                             | Registry                    | 15 148  | Yes           | Yes | 554  | <b>3.7%</b> |
| <b>Nassoiy, 2016(20)</b>                             | Registry                    | 5 065   | Not specified | Yes | 408  | <b>8.1%</b> |
| <b>Bhave, 2012<sup>+</sup> (21)</b>                  | Registry                    | 363 092 | Not specified | Yes | 3602 | <b>1.0%</b> |
| <b>POISE Study Group, 2008<sup>†</sup> (22) (23)</b> | Prospective, interventional | 4177    | Yes           | No  | 120  | <b>2.9%</b> |
| <b>POISE-2 Study Group, 2014<sup>†(24)</sup></b>     | Prospective, interventional | 10 010  | Yes           | No  | 203  | <b>2.0%</b> |
| <b>Xia, 2015(25)</b>                                 | Retrospective               | 1387    | Not specified | No  | 102  | <b>7.4%</b> |
| <b>Leibowitz, 2017(26)</b>                           | Retrospective               | 410     | Not specified | Yes | 15   | <b>3.7%</b> |

**Footnotes:** In interventional studies (Amar, Cardinale, Riber, POISE) patients randomized to intervention groups are not presented in this table.

\* number includes atrial fibrillation and atrial flutter;

‡ patients with elevated BNP levels that were assigned to the intervention line with antiarrhythmic treatments (n= 205) were excluded;

+ 2.2% of patients underwent thoracic surgery;

† study included patients who underwent thoracic surgeries;

\*\* study includes 31,192 patients undergoing thoracic surgery among whom POAF incidence was 2.7%

### References to Supplementary Table 1:

1. Amar D, Roistacher N, Rusch VW et al. Effects of diltiazem prophylaxis on the incidence and clinical outcome of atrial arrhythmias after thoracic surgery. *J Thorac Cardiovasc Surg* 2000;120:790-8.
2. Passman RS, Gingold DS, Amar D et al. Prediction rule for atrial fibrillation after major noncardiac thoracic surgery. *Ann Thorac Surg* 2005;79:1698-703.
3. Roselli EE, Murthy SC, Rice TW et al. Atrial fibrillation complicating lung cancer resection. *J Thorac Cardiovasc Surg* 2005;130:438-44.
4. Cardinale D, Colombo A, Sandri MT et al. Increased perioperative N-terminal pro-B-type natriuretic peptide levels predict atrial fibrillation after thoracic surgery for lung cancer. *Circulation* 2007;115:1339-44.
5. Riber LP, Christensen TD, Jensen HK, Hoejsgaard A, Pilegaard HK. Amiodarone significantly decreases atrial fibrillation in patients undergoing surgery for lung cancer. *Ann Thorac Surg* 2012;94:339-44; discussion 345-6.
6. Rao VP, Addae-Boateng E, Barua A, Martin-Ucar AE, Duffy JP. Age and neo-adjuvant chemotherapy increase the risk of atrial fibrillation following oesophagectomy. *Eur J Cardiothorac Surg* 2012;42:438-43.
7. Berry MF, D'Amico TA, Onaitis MW. Use of amiodarone after major lung resection. *Ann Thorac Surg* 2014;98:1199-206.



8. Gialdini G, Nearing K, Bhawe PD et al. Perioperative atrial fibrillation and the long-term risk of ischemic stroke. *JAMA* 2014;312:616-22.
9. Cardinale D, Sandri MT, Colombo A et al. Prevention of Atrial Fibrillation in High-risk Patients Undergoing Lung Cancer Surgery: The PRESAGE Trial. *Annals of surgery* 2016;264:244-51.
10. Lee SH, Ahn HJ, Yeon SM et al. Potentially modifiable risk factors for atrial fibrillation following lung resection surgery: a retrospective cohort study. *Anaesthesia* 2016;71:1424-1430.
11. Chin JH, Moon YJ, Jo JY et al. Association between Postoperatively Developed Atrial Fibrillation and Long-Term Mortality after Esophagectomy in Esophageal Cancer Patients: An Observational Study. *PLoS One* 2016;11:e0154931.
12. Butt JH, Olesen JB, Havers-Borgersen E et al. Risk of Thromboembolism Associated With Atrial Fibrillation Following Noncardiac Surgery. *Journal of the American College of Cardiology* 2018;72:2027-2036.
13. Nielsen TD, Bahnson T, Davis RD, Palmer SM. Atrial fibrillation after pulmonary transplant. *Chest* 2004;126:496-500.
14. Imperatori A, Mariscalco G, Riganti G, Rotolo N, Conti V, Dominioni L. Atrial fibrillation after pulmonary lobectomy for lung cancer affects long-term survival in a prospective single-center study. *J Cardiothorac Surg* 2012;7:4.
15. Brathwaite D, Weissman C. The new onset of atrial arrhythmias following major noncardiothoracic surgery is associated with increased mortality. *Chest* 1998;114:462-8.
16. Polanczyk CA, Goldman L, Marcantonio ER, Orav EJ, Lee TH. Supraventricular arrhythmia in patients having noncardiac surgery: clinical correlates and effect on length of stay. *Ann Intern Med* 1998;129:279-85.
17. Sohn GH, Shin DH, Byun KM et al. The incidence and predictors of postoperative atrial fibrillation after noncardiothoracic surgery. *Korean Circ J* 2009;39:100-4.
18. Blackwell RH, Ellimoottil C, Bajic P et al. Postoperative Atrial Fibrillation Predicts Long-Term Cardiovascular Events after Radical Cystectomy. *J Urol* 2015;194:944-9.
19. Kothari AN, Halandras PM, Drescher M et al. Transient postoperative atrial fibrillation after abdominal aortic aneurysm repair increases mortality risk. *Journal of vascular surgery* 2016;63:1240-7.
20. Nassoiy SP, Blackwell RH, Kothari AN et al. New onset postoperative atrial fibrillation predicts long-term cardiovascular events after gastrectomy. *Am J Surg* 2016;211:559-64.
21. Bhawe PD, Goldman LE, Vittinghoff E, Maselli J, Auerbach A. Incidence, predictors, and outcomes associated with postoperative atrial fibrillation after major noncardiac surgery. *American heart journal* 2012;164:918-24.
22. Group PS, Devereaux PJ, Yang H et al. Effects of extended-release metoprolol succinate in patients undergoing non-cardiac surgery (POISE trial): a randomised controlled trial. *Lancet* 2008;371:1839-47.
23. Alonso-Coello P, Cook D, Xu SC et al. Predictors, Prognosis, and Management of New Clinically Important Atrial Fibrillation After Noncardiac Surgery: A Prospective Cohort Study. *Anesth Analg* 2017;125:162-169.
24. Devereaux PJ, Mrkobrada M, Sessler DI et al. Aspirin in patients undergoing noncardiac surgery. *The New England journal of medicine* 2014;370:1494-503.
25. Xia VW, Worapot A, Huang S et al. Postoperative atrial fibrillation in liver transplantation. *Am J Transplant* 2015;15:687-94.
26. Leibowitz D, Abitbol C, Alcalai R, Rivkin G, Kandel L. Perioperative atrial fibrillation is associated with increased one-year mortality in elderly patients after repair of hip fracture. *Int J Cardiol* 2017;227:58-60.

**Supplementary Table 2.** List of participating centers.

| <b>Continent</b> | <b>Country</b> | <b>Center</b>                                        |
|------------------|----------------|------------------------------------------------------|
| North America    | Canada         | Juravinski Hospital and Cancer Centre, Hamilton      |
|                  |                | Saint Joseph's Healthcare, Hamilton                  |
|                  |                | Hamilton General Hospital, Hamilton                  |
|                  |                | McMaster University Medical Centre, Hamilton         |
|                  |                | Health Sciences Centre Winnipeg, Winnipeg            |
|                  |                | Walter C. MacKenzie Health Sciences Centre, Edmonton |
|                  | United States  | Victoria Hospital, London                            |
|                  | Asia           | China                                                |
| India            |                | Washington University School of Medicine, St. Louis  |
| Malaysia         |                | Prince of Wales Hospital, Hong Kong                  |
| Europe           | United Kingdom | St. John's Medical College Hospital, Bangalore       |
|                  |                | Christian Medical College, Ludhiana                  |
|                  |                | University Malaya Medical Centre, Kuala Lumpur       |
|                  |                | Barts And The London, London                         |
|                  | Spain          | University College Hospital, London                  |
|                  |                | Leeds Teaching Hospitals, Leeds                      |
|                  | Poland         | Royal Liverpool University Hospital, Liverpool       |
|                  | France         | Hospital de Sant Pau, Barcelona                      |
| South America    | Brazil         | Hospital Gregorio Maranon, Madrid                    |
|                  |                | Jagiellonian University Medical College, Kraków      |
|                  | Colombia       | Pitie-Salpetriere Hospital, Paris                    |
|                  | Peru           | Hospital do Coracao, São Paulo                       |
| Africa           | South Africa   | Hospital de Clinicas de Porto Alegre, Porto Alegre   |
|                  |                | Hospital Universitario de Santander, Bucaramanga     |
| Australia        | Australia      | Foundation CardioInfantil, Bogota                    |
|                  |                | Hospital Nacional Cayetano Heredia, Lima             |
|                  |                | Inkosi Albert Luthuli Hospital, Durban               |
|                  |                | Westmead Hospital, Sydney                            |

**Supplementary Table 3.** STROBE Statement Checklist of items that should be included in reports of cohort studies.

|                           | <b>Item No</b> | <b>Recommendation</b>                                                                                                                                                                                        | <b>Page/Table/ Figure</b>    |
|---------------------------|----------------|--------------------------------------------------------------------------------------------------------------------------------------------------------------------------------------------------------------|------------------------------|
| <b>Title and abstract</b> | 1              | (a) Indicate the study's design with a commonly used term in the title or the abstract                                                                                                                       | p. 1                         |
|                           |                | (b) Provide in the abstract an informative and balanced summary of what was done and what was found                                                                                                          | p. 2                         |
| <b>Introduction</b>       |                |                                                                                                                                                                                                              |                              |
| Background/rationale      | 2              | Explain the scientific background and rationale for the investigation being reported                                                                                                                         | p. 3                         |
| Objectives                | 3              | State specific objectives, including any prespecified hypotheses                                                                                                                                             | p. 3                         |
| <b>Methods</b>            |                |                                                                                                                                                                                                              |                              |
| Study design              | 4              | Present key elements of study design early in the paper                                                                                                                                                      | p. 3-4                       |
| Setting                   | 5              | Describe the setting, locations, and relevant dates, including periods of recruitment, exposure, follow-up, and data collection                                                                              | p. 4                         |
| Participants              | 6              | (a) Give the eligibility criteria, and the sources and methods of selection of participants. Describe methods of follow-up                                                                                   | p. 4                         |
|                           |                | (b) For matched studies, give matching criteria and number of exposed and unexposed                                                                                                                          | NA                           |
| Variables                 | 7              | Clearly define all outcomes, exposures, predictors, potential confounders, and effect modifiers. Give diagnostic criteria, if applicable                                                                     | p. 3-5                       |
| Data sources/ measurement | 8*             | For each variable of interest, give sources of data and details of methods of assessment (measurement). Describe comparability of assessment methods if there is more than one group                         | p. 4-5                       |
| Bias                      | 9              | Describe any efforts to address potential sources of bias                                                                                                                                                    | p. 5-6                       |
| Study size                | 10             | Explain how the study size was arrived at                                                                                                                                                                    | p. 4                         |
| Quantitative variables    | 11             | Explain how quantitative variables were handled in the analyses. If applicable, describe which groupings were chosen and why                                                                                 | p. 5-6                       |
| Statistical methods       | 12             | (a) Describe all statistical methods, including those used to control for confounding                                                                                                                        | p. 5-6                       |
|                           |                | (b) Describe any methods used to examine subgroups and interactions                                                                                                                                          | p. 5-6                       |
|                           |                | (c) Explain how missing data were addressed                                                                                                                                                                  | p. 5-6                       |
|                           |                | (d) If applicable, explain how loss to follow-up was addressed                                                                                                                                               | p. 5-6                       |
|                           |                | (e) Describe any sensitivity analyses                                                                                                                                                                        | p. 5-6                       |
| <b>Results</b>            |                |                                                                                                                                                                                                              |                              |
| Participants              | 13*            | (a) Report numbers of individuals at each stage of study—eg numbers potentially eligible, examined for eligibility, confirmed eligible, included in the study, completing follow-up, and analysed            | p. 6-7                       |
|                           |                | (b) Give reasons for non-participation at each stage                                                                                                                                                         | p. 6-7                       |
|                           |                | (c) Consider use of a flow diagram                                                                                                                                                                           | Fig.1                        |
| Descriptive data          | 14*            | (a) Give characteristics of study participants (eg demographic, clinical, social) and information on exposures and potential confounders                                                                     | p. 6-7<br>Tab. 1             |
|                           |                | (b) Indicate number of participants with missing data for each variable of interest                                                                                                                          | p. 6-7<br>Tab. 1             |
|                           |                | (c) Summarise follow-up time (eg, average and total amount)                                                                                                                                                  | p. 4<br>Fig. 1               |
| Outcome data              | 15*            | Report numbers of outcome events or summary measures over time                                                                                                                                               | p. 7                         |
| Main results              | 16             | (a) Give unadjusted estimates and, if applicable, confounder-adjusted estimates and their precision (eg, 95% confidence interval). Make clear which confounders were adjusted for and why they were included | p. 6-8<br>Tab. 1-2<br>Fig. 3 |
|                           |                | (b) Report category boundaries when continuous variables were categorized                                                                                                                                    | NA                           |

|                          |    |                                                                                                                                                                            |            |
|--------------------------|----|----------------------------------------------------------------------------------------------------------------------------------------------------------------------------|------------|
|                          |    | (c) If relevant, consider translating estimates of relative risk into absolute risk for a meaningful time period                                                           | NA         |
| Other analyses           | 17 | Report other analyses done—eg analyses of subgroups and interactions, and sensitivity analyses                                                                             | Supplement |
| <b>Discussion</b>        |    |                                                                                                                                                                            |            |
| Key results              | 18 | Summarise key results with reference to study objectives                                                                                                                   | p. 8       |
| Limitations              | 19 | Discuss limitations of the study, taking into account sources of potential bias or imprecision. Discuss both direction and magnitude of any potential bias                 | p. 10      |
| Interpretation           | 20 | Give a cautious overall interpretation of results considering objectives, limitations, multiplicity of analyses, results from similar studies, and other relevant evidence | p. 11      |
| Generalisability         | 21 | Discuss the generalisability (external validity) of the study results                                                                                                      | p. 8-9     |
| <b>Other information</b> |    |                                                                                                                                                                            |            |
| Funding                  | 22 | Give the source of funding and the role of the funders for the present study and, if applicable, for the original study on which the present article is based              | p. 1       |

**Supplementary Table 4.** Demographic and clinical characteristics stratified for occurrence of new onset clinically important POAF in patients who had NT-proBNP measured before surgery– a univariable analysis.

|                                                                   | <i>Patients with NT-proBNP measurement and without POAF within 30 days after surgery<br/>N=9680</i> |       | <i>Patients with NT-proBNP measurement and with POAF within 30 days after surgery<br/>N=109</i> |       | <i>p-value</i> |
|-------------------------------------------------------------------|-----------------------------------------------------------------------------------------------------|-------|-------------------------------------------------------------------------------------------------|-------|----------------|
|                                                                   | n                                                                                                   | %     | n                                                                                               | %     |                |
| <b>Demographics</b>                                               |                                                                                                     |       |                                                                                                 |       |                |
| Age                                                               | 64.2 (10.9)                                                                                         |       | 73.3 (10.5)                                                                                     |       | <0.001         |
| Female                                                            | 4909                                                                                                | 49.3% | 50                                                                                              | 45.9% | 0.363          |
| Frail                                                             | 366                                                                                                 | 3.8%  | 6                                                                                               | 5.5%  | 0.495          |
| <b>Smoking history</b>                                            |                                                                                                     |       |                                                                                                 |       |                |
| History of smoking                                                | 8162                                                                                                | 84.3% | 93                                                                                              | 85.3% |                |
| Current smoker                                                    | 4698                                                                                                | 48.6% | 40                                                                                              | 36.7% | 0.017          |
| Former smoker                                                     | 3464                                                                                                | 35.8% | 53                                                                                              | 48.6% |                |
| <b>Medical History</b>                                            |                                                                                                     |       |                                                                                                 |       |                |
| Coronary artery disease                                           | 1250                                                                                                | 12.9% | 27                                                                                              | 24.8% | <0.001         |
| Recent high-risk CAD                                              | 76                                                                                                  | 0.8%  | 2                                                                                               | 1.8%  | 0.22           |
| Congestive heart failure                                          | 219                                                                                                 | 2.3%  | 5                                                                                               | 4.6%  | 0.197          |
| Aortic stenosis                                                   | 87                                                                                                  | 0.9%  | 5                                                                                               | 4.6%  | 0.001          |
| Peripheral vascular disease                                       | 684                                                                                                 | 7.1%  | 13                                                                                              | 11.9% | 0.076          |
| History of CVE                                                    | 593                                                                                                 | 6.1%  | 9                                                                                               | 8.3%  | 0.47           |
| History of DVT/PE                                                 | 360                                                                                                 | 3.7%  | 1                                                                                               | 0.9%  | 0.19           |
| Hypertension                                                      | 5013                                                                                                | 51.8% | 70                                                                                              | 64.2% | 0.013          |
| Diabetes                                                          | 1916                                                                                                | 19.8% | 27                                                                                              | 24.8% | 0.24           |
| Chronic obstructive pulmonary disease                             | 724                                                                                                 | 7.5%  | 22                                                                                              | 20.2% | <0.001         |
| Obstructive sleep apnea                                           | 607                                                                                                 | 6.3%  | 7                                                                                               | 6.4%  | 1.0            |
| <b>Pre-operative medications ≤24h before surgery</b>              |                                                                                                     |       |                                                                                                 |       |                |
| Beta-blockers                                                     | 1619                                                                                                | 16.7% | 23                                                                                              | 21.1% | 0.278          |
| Rate controlling calcium channel blocker                          | 203                                                                                                 | 2.1%  | 3                                                                                               | 2.8%  | 0.891          |
| <b>Pre-operative medications &gt;24h to 7 days before surgery</b> |                                                                                                     |       |                                                                                                 |       |                |
| Beta-blockers                                                     | 1808                                                                                                | 18.7% | 27                                                                                              | 24.8% | 0.135          |
| Rate controlling calcium channel blocker                          | 233                                                                                                 | 2.4%  | 1                                                                                               | 0.9%  | 0.485          |
| <b>Surgery</b>                                                    |                                                                                                     |       |                                                                                                 |       |                |
| Urgent/Emergent                                                   | 415                                                                                                 | 4.3%  | 9                                                                                               | 8.3%  | 0.074          |
| Thoracic surgery                                                  | 255                                                                                                 | 2.6%  | 5                                                                                               | 4.6%  | <0.001         |

|                                          |                  |       |                    |       |        |
|------------------------------------------|------------------|-------|--------------------|-------|--------|
| Major nonthoracic surgery                | 6447             | 66.6% | 94                 | 86.2% |        |
| Other surgeries                          | 2978             | 30.8% | 10                 | 9.2%  |        |
| <b>Type of anesthesia</b>                |                  |       |                    |       |        |
| General anesthesia                       | 5649             | 58.4% | 56                 | 51.4% |        |
| Regional anesthesia                      | 2706             | 28.0% | 27                 | 24.8% | 0.009  |
| Combined general and regional anesthesia | 1318             | 13.6% | 26                 | 23.9% |        |
| <b>Hemoglobin, g/L</b>                   |                  |       |                    |       |        |
| Mean (SD)                                | 132.9 (17.7)     |       | 128.4 (18.7)       |       |        |
| Median (IQR)                             | 132 (120-143)    |       | 128 (113-140)      |       | 0.02   |
| <b>eGFR, ml/minute/1.73m2</b>            |                  |       |                    |       |        |
| Mean (SD)                                | 79.4 (22.0)      |       | 69.7 (23.1)        |       |        |
| Median (IQR)                             | 83.0 (67.0-94.9) |       | 76.4 (51.8 – 87.1) |       | <0.001 |

**Supplementary Table 5.** Demographic and clinical characteristics of patients with and without NT-proBNP measurement– a univariable analysis.

|                                          | <i>Patients with NT-proBNP measurement</i><br><i>N=9789</i> |          | <i>Patients without NT-proBNP measurement</i><br><i>N=27875</i> |          | <i>p-value</i> |
|------------------------------------------|-------------------------------------------------------------|----------|-----------------------------------------------------------------|----------|----------------|
|                                          | <i>n</i>                                                    | <i>%</i> | <i>n</i>                                                        | <i>%</i> |                |
| <b>Demographics</b>                      |                                                             |          |                                                                 |          |                |
| Age                                      | 64.3 (11.0)                                                 |          | 63.2 (11.1)                                                     |          | <0.001         |
| Female                                   | 4830                                                        | 49.3%    | 13941                                                           | 50.0%    | 0.258          |
| Frail                                    | 372                                                         | 3.8%     | 1716                                                            | 6.2%     | <0.001         |
| <b>Smoking history</b>                   |                                                             |          |                                                                 |          |                |
| History of smoking                       | 8255                                                        | 84.3%    | 24055                                                           | 86.3%    |                |
| Current smoker                           | 4738                                                        | 48.5%    | 15474                                                           | 55.6%    | <0.001         |
| Former smoker                            | 3517                                                        | 36.0%    | 8581                                                            | 30.8%    |                |
| <b>Medical History</b>                   |                                                             |          |                                                                 |          |                |
| Coronary artery disease                  | 1277                                                        | 13.0%    | 3041                                                            | 10.9%    | <0.001         |
| Recent high-risk CAD                     | 78                                                          | 0.8%     | 235                                                             | 0.8%     | 0.66           |
| Congestive heart failure                 | 224                                                         | 2.3%     | 688                                                             | 2.5%     | 0.339          |
| Peripheral vascular disease              | 697                                                         | 7.1%     | 2106                                                            | 7.6%     | 0.165          |
| History of CVE                           | 602                                                         | 6.1%     | 1570                                                            | 5.6%     | 0.062          |
| Hypertension                             | 5083                                                        | 51.9%    | 13361                                                           | 47.9%    | <0.001         |
| Diabetes                                 | 1943                                                        | 19.8%    | 5787                                                            | 20.8%    | 0.056          |
| COPD                                     | 746                                                         | 7.6%     | 1999                                                            | 7.2%     | 0.147          |
| <b>Surgery</b>                           |                                                             |          |                                                                 |          |                |
| Urgent/Emergent                          | 424                                                         | 4.3%     | 3430                                                            | 12.3%    | <0.001         |
| Thoracic surgery                         | 260                                                         | 2.7%     | 828                                                             | 3.0%     |                |
| Major nonthoracic surgery                | 6541                                                        | 66.8%    | 16267                                                           | 58.4%    | <0.001         |
| Other surgeries                          | 2988                                                        | 30.5%    | 10780                                                           | 38.7%    |                |
| <b>Type of anesthesia</b>                |                                                             |          |                                                                 |          |                |
| General anesthesia                       | 5705                                                        | 58.3%    | 17443                                                           | 62.7%    |                |
| Regional anesthesia                      | 2733                                                        | 27.9%    | 7487                                                            | 26.9%    | <0.001         |
| Combined anesthesia                      | 1344                                                        | 13.7%    | 2900                                                            | 10.4%    |                |
| <b>Hemoglobin, g/L</b>                   |                                                             |          |                                                                 |          |                |
| Median (IQR)                             | 134.0 (123.0-145.0)                                         |          | 131.0 (118.0-143.0)                                             |          | <0.001         |
| <b>eGFR, ml/minute/1.73m<sup>2</sup></b> |                                                             |          |                                                                 |          |                |
| Median (IQR)                             | 82.9 (66.9-94.9)                                            |          | 85.3 (67.8-97.9)                                                |          | <0.001         |
| <b>Outcomes</b>                          |                                                             |          |                                                                 |          |                |
| POAF                                     | 109                                                         | 1.1%     | 260                                                             | 0.9%     | 0.133          |
| Vascular death in 30 days                | 44                                                          | 0.4%     | 219                                                             | 0.8%     | 0.001          |
| Myocardial infarction in 30 days         | 330                                                         | 3.4%     | 861                                                             | 3.1%     | 0.180          |
| Non-fatal cardiac arrest in 30 days      | 9                                                           | 0.1%     | 31                                                              | 0.1%     | 0.747          |

## ONLINE FIGURES

**Supplementary Figure 1.** Histogram of CHA<sub>2</sub>DS<sub>2</sub>-VASc scores among patients who developed perioperative atrial fibrillation.

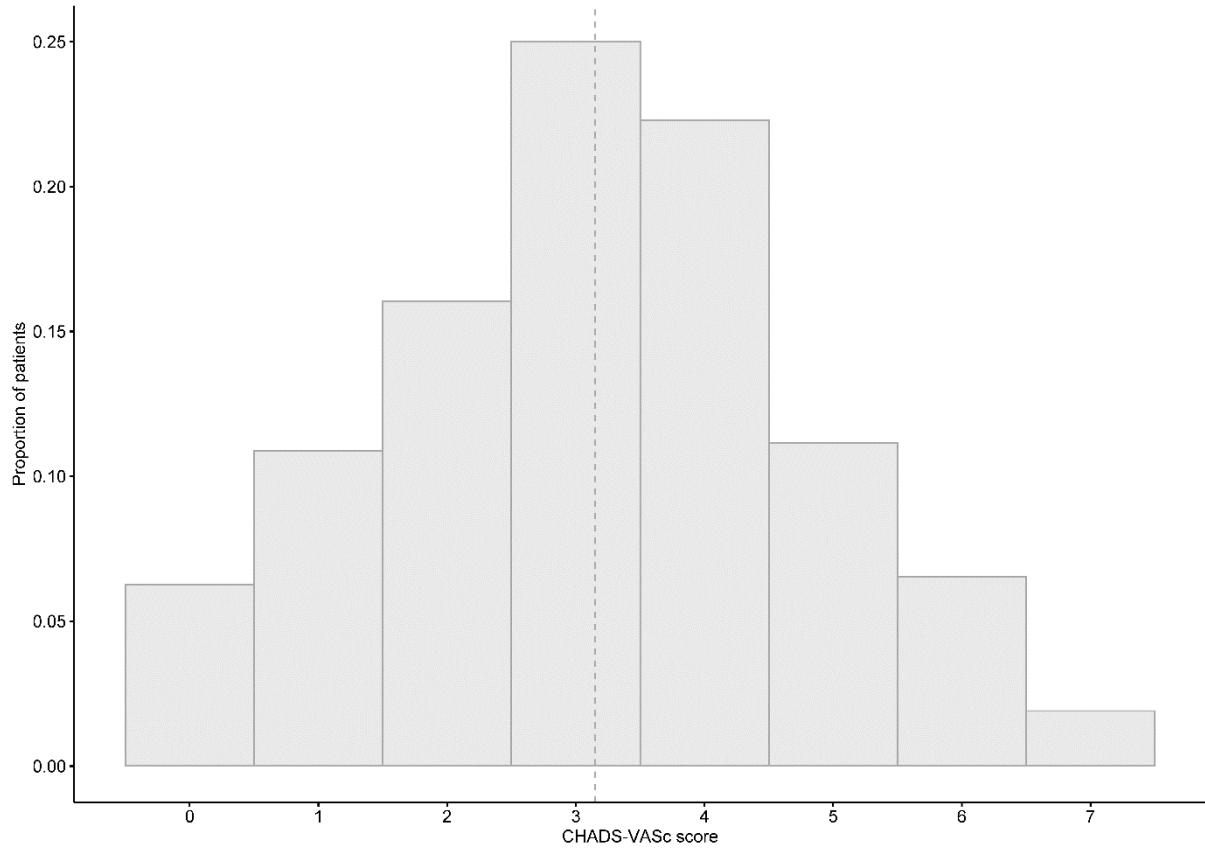

**Footnote:** Dashed line represents median CHA<sub>2</sub>DS<sub>2</sub>-VASc score.
